# Supplementary material for: Direct Analysis of Pharmaceutical Drugs Using Nano-DESI MS
Source: PubMed Central journal article supplement (PMC5059531; doi:10.1155/2016/3591908), 2016-09-28
Supplement: 3591908.f1.pdf [file 3591908.f1.pdf]

# Direct Analysis of Pharmaceutical Drugs using nano-DESI MS

Carlos Cardoso Palacios<sup>1</sup>, Ingela Lanekoff<sup>1,\*</sup>

Department of Chemistry – BMC, Uppsala University

## Supporting information

Table S1. Pharmaceutical drugs investigated. Table shows APIs and amount per tablet, manufacturing company and commercial type of drug.

| <b>Tradename</b>        | <b>API (mg)</b>          | <b>Company</b>   | <b>Type</b> |
|-------------------------|--------------------------|------------------|-------------|
| Ipren (IP)              | Ibuprofen (400)          | McNeil Sweden AB | Brand name  |
| Ibuzin (IZ)             | Ibuprofen (400)          | Apofri           | Generic     |
| Ibuprofen apofri (IA)   | Ibuprofen (400)          | Apofri           | Generic     |
| Alvedon (AL)            | Paracetamol (500)        | GlaxoSmithKline  | Brand name  |
| Panodil (PN)            | Paracetamol (500)        | GlaxoSmithKline  | Generic     |
| Paracetamol apofri (PA) | Paracetamol (500)        | Apofri           | Generic     |
| Alvedon (expired) (X)   | Paracetamol (500)        | AstraZeneca      | Brand name  |
| Viagra (V)              | Sildenafil citrate (100) | Pfizer           | Brand name  |
| Viagra (expired) (GV)   | Sildenafil citrate (100) | Pfizer           | Brand name  |
| Viagire (VE)            | Sildenafil citrate (50)  | Roid +           | Generic     |
| Kamagra (gel) (K)       | Sildenafil citrate (100) | Ajanta Pharma    | Generic     |
| Cialis (C)              | Tadalafil (20)           | Lilly            | Brand name  |
| Tadacip (T)             | Tadalafil (20)           | Cipla            | Generic     |
| Erectalis (E)           | Tadalafil (20)           | Cipla            | Generic     |

Table S2. Number of replicate analysis for each pharmaceutical drug and number of ions chemometrically analyzed with PCA.

| Tradename               | Replicates |
|-------------------------|------------|
| Ipren (IP)              | 3          |
| Ibuzin (IZ)             | 2          |
| Ibuprofen apofri (IA)   | 2          |
| Alvedon (AL)            | 2          |
| Panodil (PN)            | 4          |
| Paracetamol apofri (PA) | 2          |
| Alvedon (expired) (X)   | 2          |
| Viagra (V)              | 6          |
| Viagra (expired) (GV)   | 5          |
| Viagire (VE)            | 7          |
| Kamagra (gel) (K)       | 7          |
| Cialis (C)              | 8          |
| Tadacip (T)             | 6          |
| Erectalis (E)           | 7          |

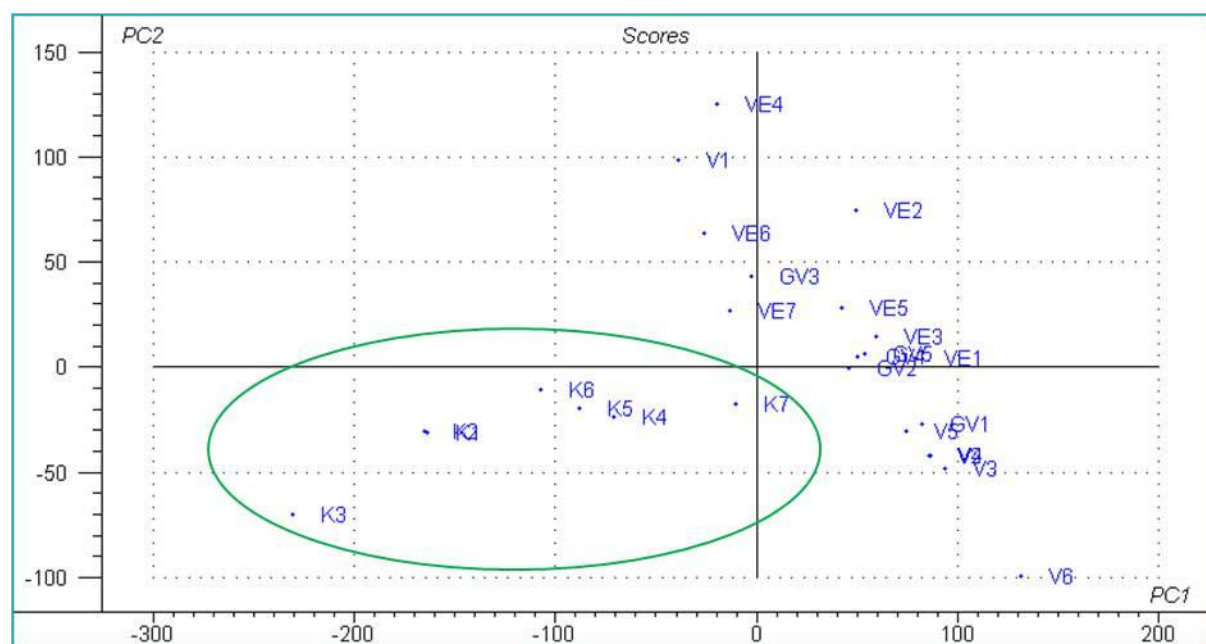

Figure S1. PCA-scores of sildenafil containing tablets. The green ring circles the cluster of Kamagra which is separated from Viagra-type tablets.
